# Supplementary material
Source: publisher figshare collection journal article supplement (https://acs.figshare.com/ndownloader/files/3755428)
Supplement: Supplementary file 1 [file 3755428]

Supporting Information:

# Lithiation Confined in One Dimensional Nanospace of TiO<sub>2</sub> (Anatase) Nanotube to Enhance the Lithium Storage Property of CuO Nanowires

*Ang Li; Huaihe Song\*; Xiaohong Chen; Jisheng Zhou; Zhaokun Ma*

State Key Laboratory of Chemical Resource Engineering; Beijing Key Laboratory of Electrochemical  
Process and Technology for Materials; Beijing University of Chemical Technology; Beijing; 100029;  
P.R. China.

## AUTHOR INFORMATION

### **Corresponding Author**

\* E-mail: songhh@mail.buct.edu.cn; Fax: +86 10-64434916; Tel: +86 10-64434916

## SI-1. XPS spectra analysis of CuO@TiO<sub>2</sub>-NCAs

XPS spectra of CuO@TiO<sub>2</sub>-NCAs are shown in Fig.S1. The curve fitting of Cu 2p, O 1s, and Ti 2p was carried out by using Gaussian-Lorentzian peak shape after a Shirley back-ground correction. In Fig. S1a, the Cu 2p<sub>3/2</sub> peak is composed of two components at 931.8 and 933.9 eV, corresponding to Cu<sub>2</sub>O and CuO, respectively.<sup>s1,s2</sup> The peaks at 529.9 and 531.5 eV can be assigned to oxygen bonded to Ti<sup>4+</sup> and Ti<sup>3+</sup>, as illustrated in Fig. S1b.<sup>s3-s5</sup> Binding energy positions of Ti 2p<sub>3/2</sub> and Ti 2p<sub>1/2</sub> for CuO@TiO<sub>2</sub>-NCAs were 458.7 and 464.3 eV (Fig. S1c), respectively. These values are in good agreement with the binding energy values of Ti<sup>4+</sup> in TiO<sub>2</sub>. XPS spectra can also help to confirm the Ti<sup>3+</sup> defects on the interfaces. The Ti<sup>3+</sup> defects in anatase will destroy the symmetry of coordinated Ti<sup>4+</sup> ions peak at 458.7 eV.<sup>s6</sup> A small shoulder at around 457.5 eV is consistent with the existence of Ti<sup>3+</sup> defects on the interfaces, as can be seen in the red circle in Fig. S1d.<sup>s6</sup>

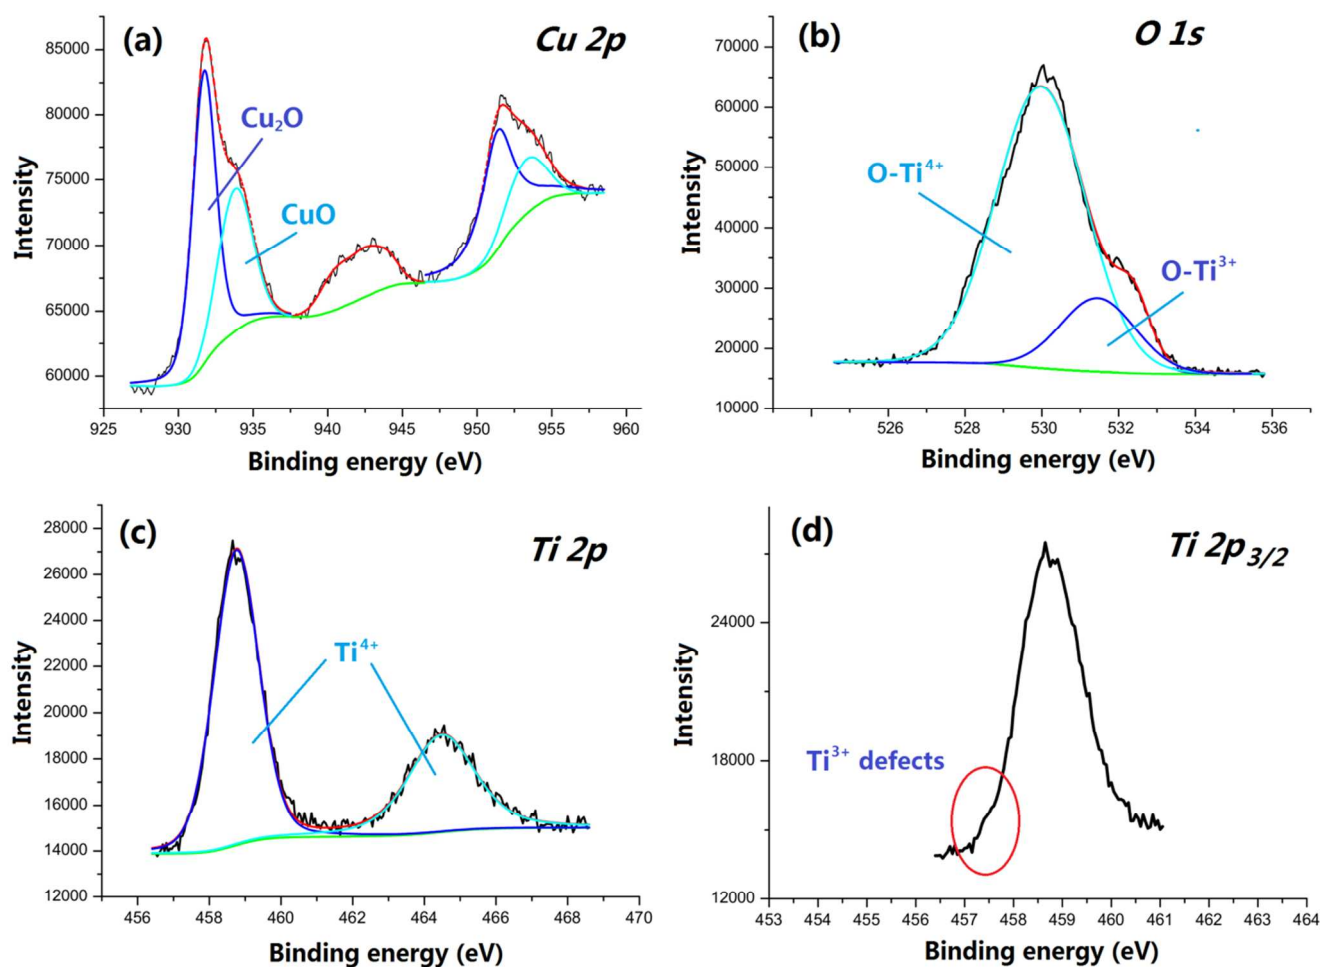

**Fig.S1** XPS spectra of  $\text{CuO@TiO}_2\text{-NCAs}$ : (a) $\text{Cu}2p$ ; (b) $\text{O}1s$ ; (c) $\text{Ti}2p$ ; (d) $\text{Ti}2p_{3/2}$ .

## SI-2. Cyclic voltammograms of CuO@TiO<sub>2</sub>-NCAs

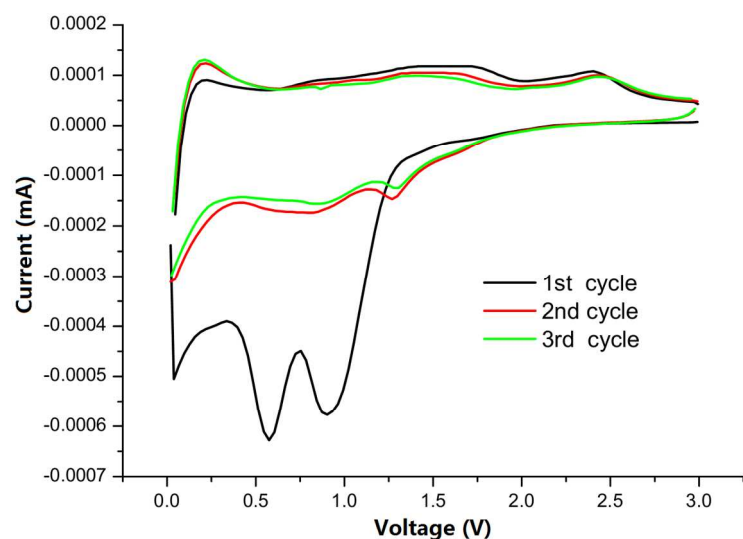

**Fig.S2** Cyclic voltammograms of CuO-NWAs electrodes with scanning rate at  $0.01 \text{ mV s}^{-1}$  in the range of 0.01-3.0 V.

## SI-3. Cycle performance of pure TiO<sub>2</sub>

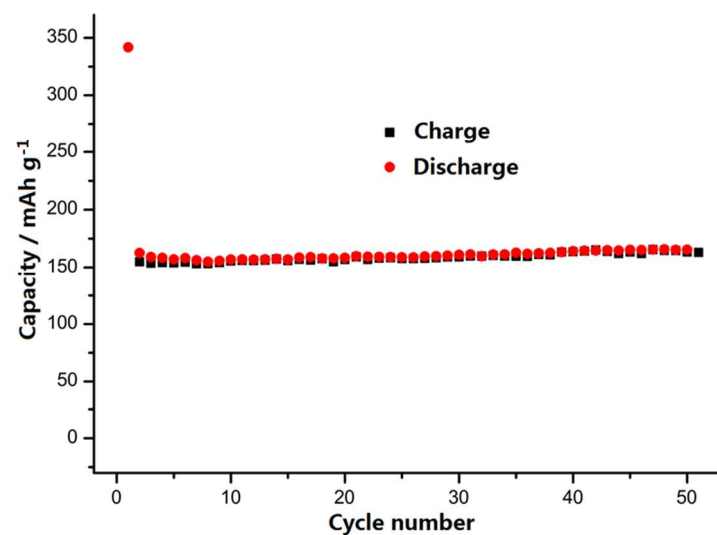

**Fig.S3** The cycle performance of pure TiO<sub>2</sub> at  $60 \text{ mA g}^{-1}$  for 50 cycles.

#### SI-4. AC impedance spectra of CuO-NWAs

The AC impedance spectra of CuO-NWAs also used modified Randles equivalent circuit as the model for EIS analysis to quantify the experimental results. The results show that  $R_f$  and  $R_{ct}$  of CuO-NWAs is 9.25 and 40.26  $\Omega$ , respectively.

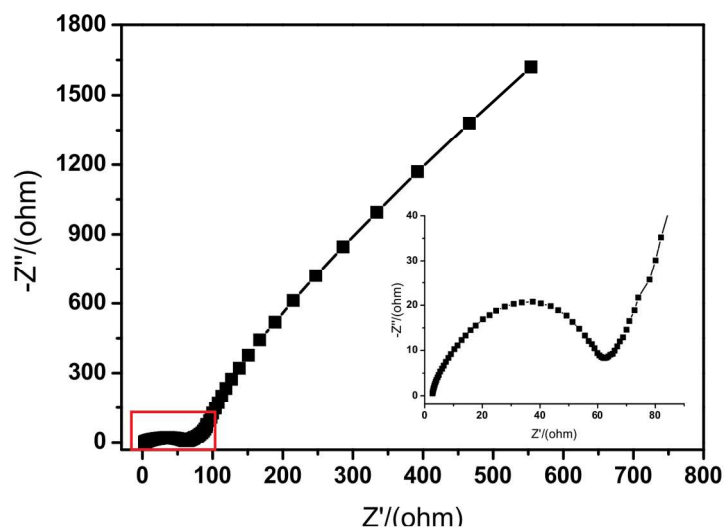

**Fig.S4** AC impedance spectra of CuO-NWAs electrodes after 100 cycles (the inset is the part of the Nyquist plots in red box).

#### SI-5. HRTEM images of the CuO core in fully lithium insertion state

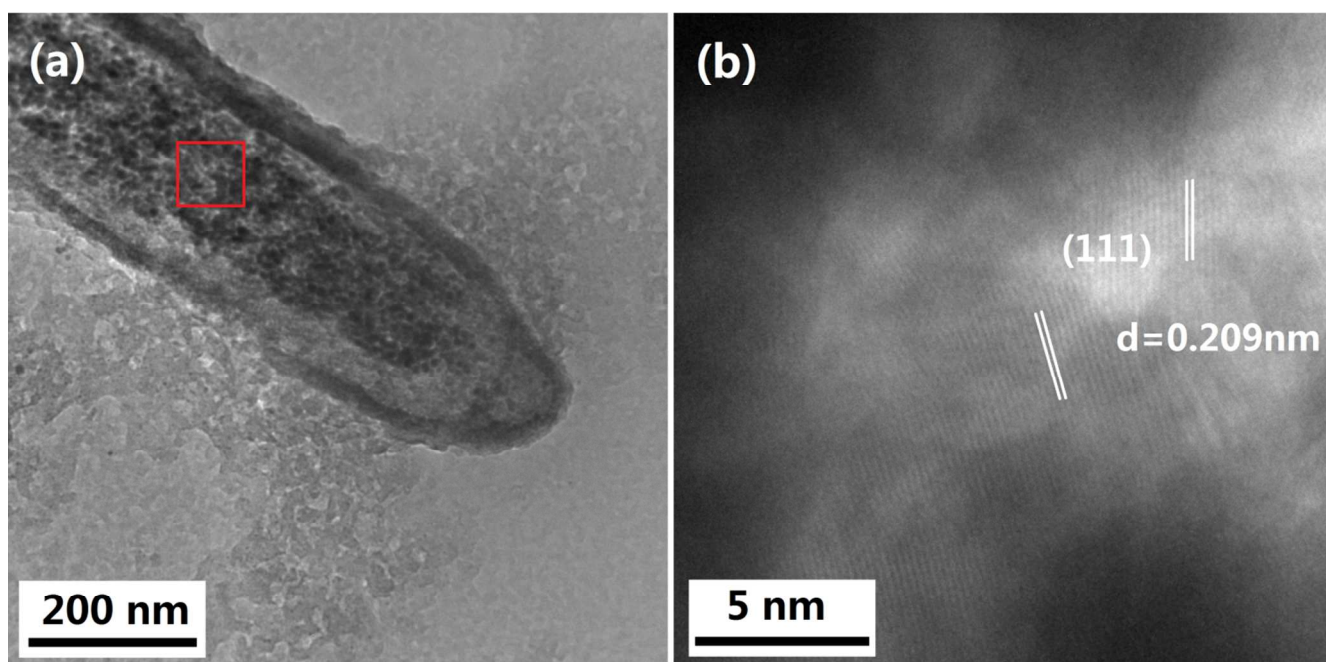

**Fig.S5** HRTEM images of the CuO core in fully lithium insertion state: (a) a view of CuO@TiO<sub>2</sub>-nanocable and its (b) details of the core.

## References

(s1) Espinos, J.; Morales, J.; Barranco, A.; Caballero, A.; Holgado, J.; Gonzalez-Elipé, A. Interface Effects for Cu, CuO, and Cu<sub>2</sub>O Deposited on SiO<sub>2</sub> and ZrO<sub>2</sub>. XPS Determination of The Valence State of Copper in Cu/SiO<sub>2</sub> and Cu/ZrO<sub>2</sub> Catalysts. *J. Phys. Chem. B* **2002**, *106*, 6921-6929.

- (s2) Poulston, S.; Parlett, P.; Stone, P.; Bowker, M. Surface Oxidation and Reduction of CuO and Cu<sub>2</sub>O Studied Using XPS and XAES. *Surf. Interface Anal.* **1996**, *24*, 811- 820.
- (s3) Kumar, P.; Badrinarayanan, S.; Sastry, M. Nanocrystalline TiO<sub>2</sub> Studied by Optical, FTIR and X-ray Photoelectron Spectroscopy: Correlation to Presence of Surface States. *Thin Solid Films* **2000**, *358*, 122–130.
- (s4) Sharma, S.; Chaudhary, S.; Kashyap, S.; Sharma, S. Room Temperature Ferromagnetism in Mn Doped TiO<sub>2</sub> Thin Films: Electronic Structure and Raman Investigations. *J. Appl. Phys.* **2011**, *109*, 083905.
- (s5) Orendorz, A.; Wüsten, J.; Ziegler, C.; Gnaser, H. Photoelectron Spectroscopy of Nanocrystalline Anatase TiO<sub>2</sub> Films. *Appl. Surf. Sci.* **2005**, *252*, 85–88.
- (s6) Shultz, A.; Jang, W.; Hetherington III, W.; Baer, D.; Wang, L.; Engelhard, M. Comparative Second Harmonic Generation and X-ray Photoelectron Spectroscopy Studies of the UV Creation and O<sub>2</sub> Healing of Ti<sup>3+</sup> Defects on (110) Rutile TiO<sub>2</sub> Surfaces. *Surf. Sci.* **1995**, *339*, 114–124.
